# Supplementary material for: Using Moss to Assess Airborne Heavy Metal Pollution in Taizhou, China
Source: PubMed Central journal article supplement (PMC5409631; doi:10.3390/ijerph14040430), 2017-04-17
Supplement: ijerph-14-00430-s001.pdf [file ijerph-14-00430-s001.pdf]

**Table S1.** Sampling sites, geographical coordinates, slope, distance from sea and aspect of the monitoring stations in Taizhou, China

| Sampling | Latitude<br>N | Longitude<br>E | Altitude(m) | Slope  | Distance        |           | Sampling | Latitude<br>N | Longitude<br>E | Altitude(m) | Slope  | Distance        |           |
|----------|---------------|----------------|-------------|--------|-----------------|-----------|----------|---------------|----------------|-------------|--------|-----------------|-----------|
|          |               |                |             |        | From<br>Sea(km) | Aspect    |          |               |                |             |        | From<br>Sea(km) | Aspect    |
| 1        | 33°09'04.2"   | 119°43'29.7"   | 4.68        | 10.79‰ | 97.89           | East      | 31       | 32°35'27.2"   | 120°07'09.3"   | 0.97        | 1.12‰  | 78.68           | Northeast |
| 2        | 33°06'28.6"   | 119°43'15.7"   | 0.63        | 3.71‰  | 100.07          | North     | 32       | 32°33'24.6"   | 120°12'53.3"   | 5.86        | 14.08‰ | 70.23           | Northwest |
| 3        | 33°06'07.6"   | 119°50'01.2"   | 3.19        | 13.32‰ | 90.61           | West      | 33       | 32°30'27.6"   | 119°50'23.4"   | 0.16        | 7.68‰  | 105.89          | East      |
| 4        | 33°05'22.8"   | 119°58'37.1"   | 2.81        | 1.61‰  | 78.78           | Southeast | 34       | 32°29'21.0"   | 119°54'16.4"   | 5.55        | 15.99‰ | 100.25          | Northeast |
| 5        | 33°05'29.5"   | 120°05'35.9"   | 1.5         | 12.34‰ | 68.66           | South     | 35       | 32°30'21.6"   | 120°01'21.1"   | 5.44        | 1.60‰  | 89.00           | North     |
| 6        | 33°04'24.8"   | 120°10'16.9"   | 1.89        | 2.77‰  | 62.70           | South     | 36       | 32°30'15.2"   | 120°09'06.8"   | 7.46        | 3.08‰  | 77.12           | South     |
| 7        | 33°03'54.6"   | 120°13'02.7"   | 1.6         | 2.06‰  | 59.20           | Northwest | 37       | 32°26'14.6"   | 120°14'24.8"   | 7           | 2.74‰  | 71.19           | Northwest |
| 8        | 33°01'49.8"   | 119°43'37.7"   | 0.53        | 3.36‰  | 102.86          | Southeast | 38       | 32°23'53.1"   | 119°55'54.0"   | 3.74        | 15.49‰ | 100.15          | West      |
| 9        | 33°00'41.1"   | 119°51'54.4"   | 1.88        | 10.06‰ | 91.77           | Southeast | 39       | 32°24'51.6"   | 120°02'50.9"   | 5.79        | 2.96‰  | 89.20           | South     |
| 10       | 32°59'10.4"   | 119°54'39.6"   | 1.11        | 2.98‰  | 88.89           | Northwest | 40       | 32°22'15.1"   | 120°09'42.6"   | 6.3         | 3.58‰  | 80.75           | East      |
| 11       | 32°59'31.0"   | 120°01'04.4"   | 3.83        | 3.46‰  | 79.53           | East      | 41       | 32°22'11.8"   | 120°14'23.7"   | 6.36        | 6.99‰  | 74.08           | Northeast |
| 12       | 33°00'56.5"   | 120°10'30.0"   | 1.45        | 1.39‰  | 65.27           | Southwest | 42       | 32°19'45.7"   | 119°52'27.3"   | 4.75        | 3.40‰  | 107.67          | Northeast |
| 13       | 33°01'02.5"   | 120°16'24.2"   | 2           | 0.33‰  | 57.31           | East      | 43       | 32°16'49.5"   | 119°59'56.2"   | 5.5         | 1.24‰  | 98.85           | North     |
| 14       | 32°57'46.3"   | 119°44'19.9"   | 3.44        | 11.55‰ | 104.74          | Southwest | 44       | 32°15'56.7"   | 120°09'03.4"   | 3.29        | 5.47‰  | 86.86           | Northwest |
| 15       | 32°57'25.7"   | 119°49'40.3"   | 1.64        | 15.11‰ | 97.30           | Southeast | 45       | 32°18'51.5"   | 120°16'24.2"   | 4.91        | 8.92‰  | 74.18           | East      |
| 16       | 32°52'58.1"   | 119°58'56.9"   | 2.32        | 20.21‰ | 88.13           | Southeast | 46       | 32°16'33.9"   | 120°19'32.6"   | 5.08        | 1.10‰  | 72.35           | Northwest |
| 17       | 32°54'14.9"   | 120°02'20.9"   | 3.49        | 9.96‰  | 82.36           | East      | 47       | 32°14'00.9"   | 119°57'43.8"   | 5.01        | 6.40‰  | 104.24          | East      |
| 18       | 32°55'59.7"   | 120°09'22.2"   | 3.62        | 12.80‰ | 70.94           | Northwest | 48       | 32°10'56.5"   | 120°01'31.4"   | 3.74        | 22.17‰ | 101.76          | South     |
| 19       | 32°50'28.5"   | 119°52'06.9"   | 1.64        | 1.98‰  | 99.68           | Northwest | 49       | 32°12'58.6"   | 120°08'32.7"   | 4.29        | 6.59‰  | 90.40           | Southwest |
| 20       | 32°47'21.8"   | 119°57'41.0"   | 2.29        | 1.95‰  | 93.05           | West      | 50       | 32°14'43.5"   | 120°13'41.1"   | 7.8         | 5.45‰  | 81.86           | Northeast |
| 21       | 32°50'48.8"   | 120°05'30.4"   | 2.18        | 12.31‰ | 79.52           | Southwest | 51       | 32°10'31.9"   | 120°18'56.6"   | 6.25        | 4.70‰  | 80.04           | Southeast |
| 22       | 32°48'27.8"   | 120°05'53.8"   | 3.19        | 3.76‰  | 80.09           | Northeast | 52       | 32°04'41.1"   | 120°00'45.6"   | 6.5         | 3.38‰  | 109.16          | Southeast |

|    |             |              |      |        |        |           |    |             |              |      |        |        |           |
|----|-------------|--------------|------|--------|--------|-----------|----|-------------|--------------|------|--------|--------|-----------|
| 23 | 32°45'14.5" | 119°56'03.7" | 3.58 | 9.96‰  | 96.12  | Southwest | 53 | 32°06'05.9" | 120°09'24.6" | 7.24 | 10.49‰ | 96.78  | West      |
| 24 | 32°44'46.0" | 120°00'27.6" | 2.26 | 10.28‰ | 89.22  | Southwest | 54 | 32°06'29.9" | 120°14'22.1" | 4.29 | 2.76‰  | 90.38  | Southeast |
| 25 | 32°43'55.8" | 120°07'08.0" | 0.78 | 5.52‰  | 78.72  | East      | 55 | 32°03'57.4" | 120°17'55.8" | 6.21 | 21.74‰ | 89.66  | Southwest |
| 26 | 32°39'00.0" | 119°58'15.4" | 1.56 | 5.25‰  | 92.29  | Northwest | 56 | 32°07'05.7" | 120°26'05.8" | 3.81 | 7.16‰  | 76.59  | South     |
| 27 | 32°36'53.9" | 120°04'45.0" | 0.35 | 1.79‰  | 82.25  | Northeast | 57 | 32°01'22.3" | 120°01'13.2" | 3.33 | 4.47‰  | 112.30 | Northwest |
| 28 | 32°32'25.1" | 119°51'31.8" | 2.7  | 13.22‰ | 103.62 | North     | 58 | 31°58'49.2" | 120°09'40.8" | 4.1  | 7.15‰  | 105.53 | Southeast |
| 29 | 32°34'51.1" | 119°54'42.7" | 3.02 | 11.50‰ | 98.19  | North     | 59 | 31°58'47.1" | 120°16'29.8" | 0.93 | 1.96‰  | 98.15  | Southeast |
| 30 | 32°33'39.1" | 120°00'54.3" | 1.02 | 4.80‰  | 88.76  | West      | 60 | 32°01'25.4" | 120°18'58.4" | 2.72 | 12.56‰ | 91.93  | Northeast |

The GIS maps of airborne trace metal deposition were generated by a Kriging interpolator technique. We calculated semi-variograms before applying Kriging interpolation. The cross validation was used to evaluate the accuracy of the model. Kriging provides a number of functions for empirical semi-variational function modeling. The commonly used functions are Circular, Spherical, Exponential, Gaussian, and Stable. In the comparison of the models obtained for different functions, we can refer to several indicators in Prediction Error. The Model that meets the following criteria are optimal: Mean Standardized is closest to 0, Root-Mean-Square is the smallest, and Average Standard Error is closest to 1. The five functions mentioned above were used for semi-variograms modeling of each element and we chose a more appropriate model for interpolation of each element with cross validation. If we show the semi-variant model of each function and the cross validation results, the content is too much. The semi-variograms of optimal model as well as the cross-validation results would be included into this supplement.

(1) The five functions mentioned above were used for semi-variograms modeling of Cd. According to the criteria mentioned previously, the Stable was a more appropriate model for interpolation of Cd with cross validation. The Semivariogram Modeling and Cross Validation for Cd were shown in Fig S1. The sill is the partial sill plus the nugget. The nugget, sill and nugget/sill are 0.26286, 0.42027, and 0.62545, respectively.

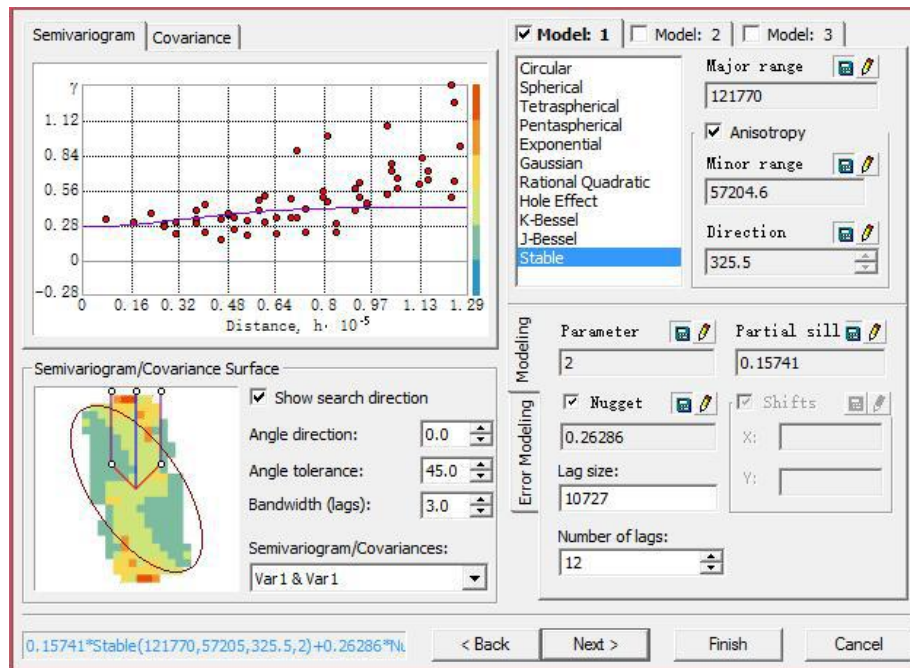

(a) The Semivariogram Modeling for Cd

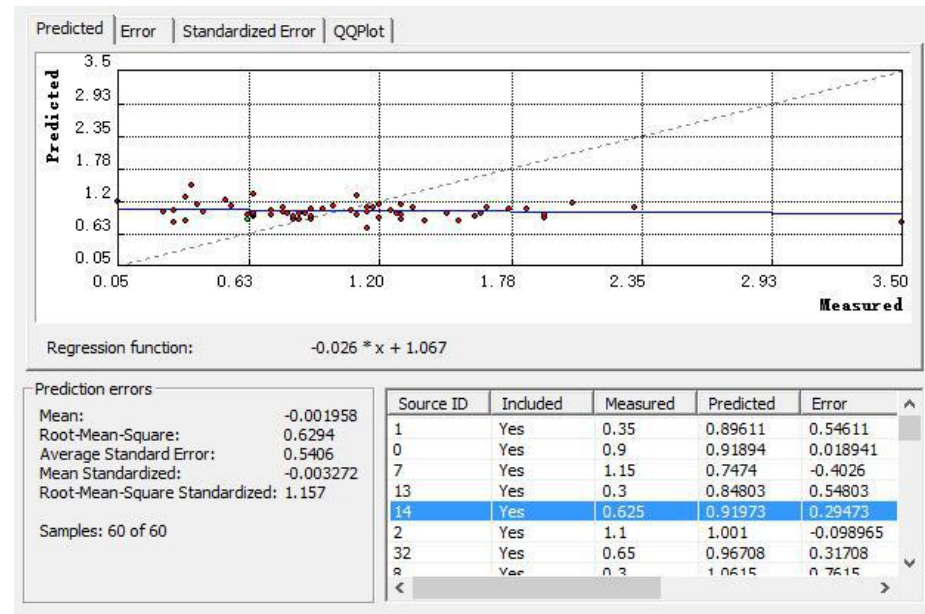

(b) The Cross Validation for Cd

Fig S1. The Semivariogram Modeling and Cross Validation for Cd

(2) The five functions mentioned above were used for semi-variograms modeling of Cr. According to the criteria mentioned previously, the Gaussian was a more appropriate model for interpolation of Cr with cross validation. The Semivariogram Modeling and Cross Validation for Cr were shown in Fig S2. The sill is the partial sill plus the nugget. The nugget, sill and nugget/sill are 220.51, 408.18, and 0.5402, respectively.

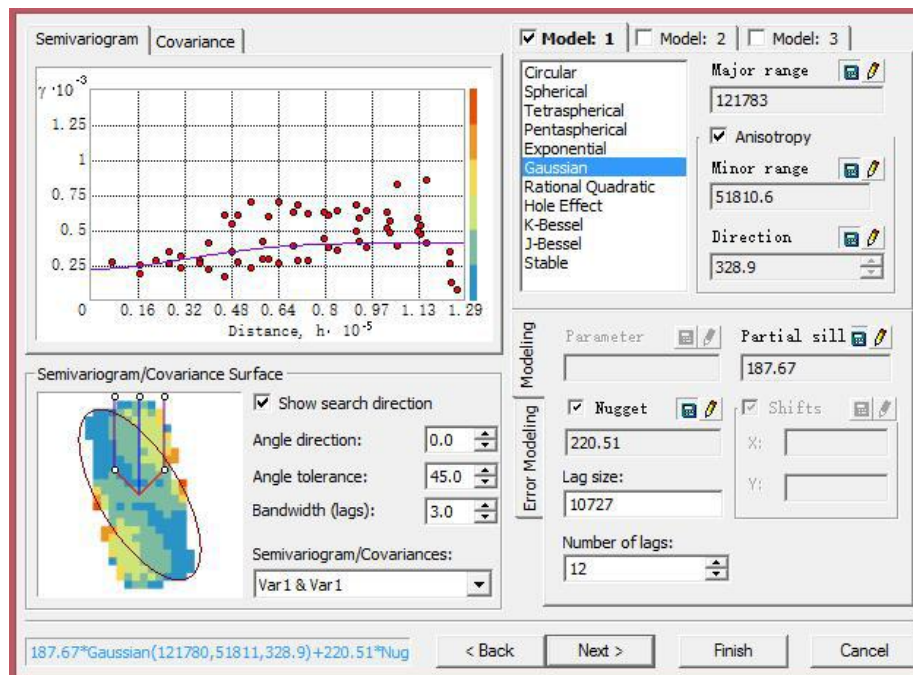

(a) The Semivariogram Modeling for Cr

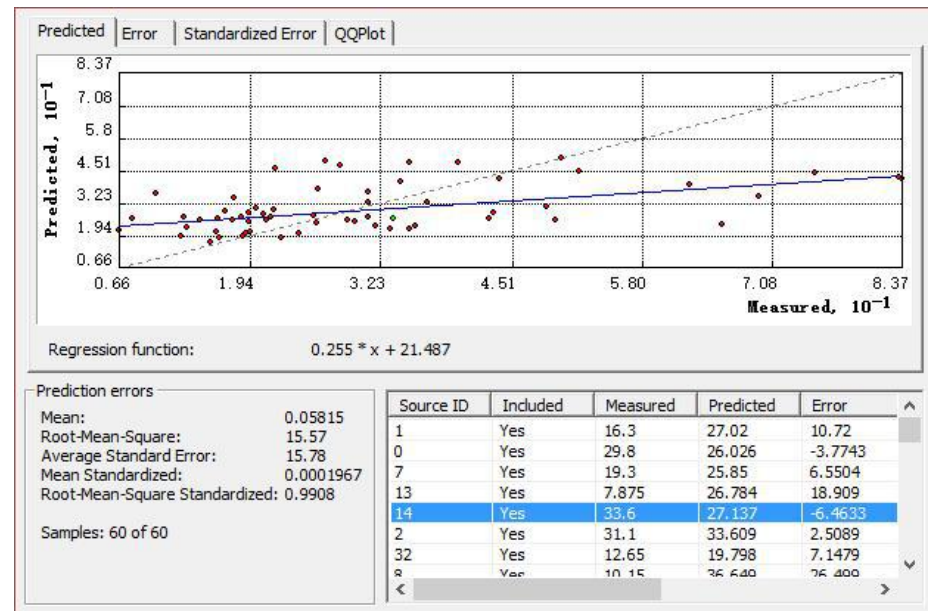

(b) The Cross Validation for Cr

Fig S2. The Semivariogram Modeling and Cross Validation for Cr

(3) The five functions mentioned above were used for semi-variograms modeling of Cu. According to the criteria mentioned previously, the Exponential was a more appropriate model for interpolation of Cu with cross validation. The Semivariogram Modeling and Cross Validation for Cu were shown in Fig S3. The sill is the partial sill plus the nugget. The nugget, sill and nugget/sill are 419.12, 628.24, and 0.6671, respectively.

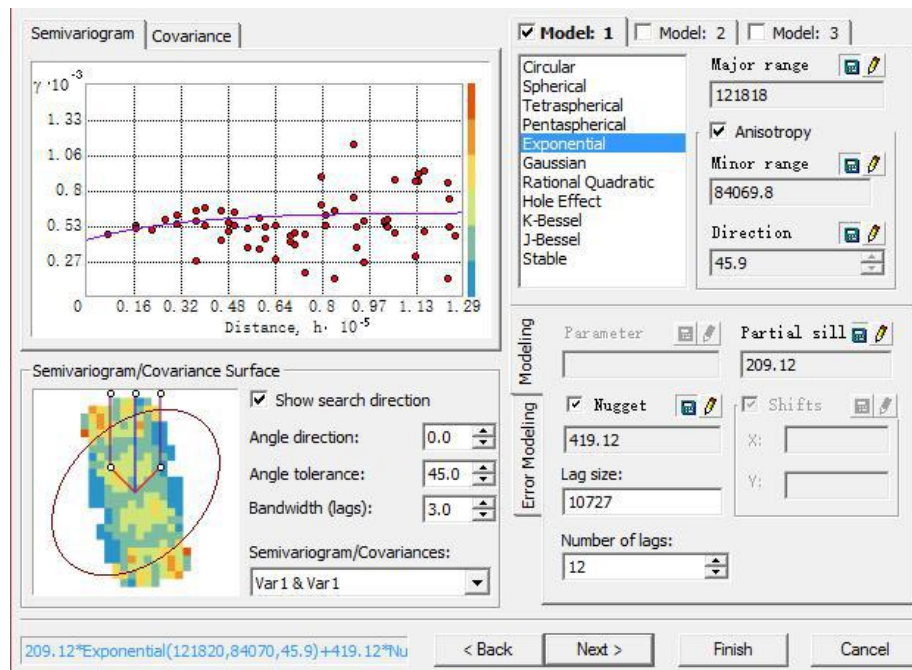

(a) The Semivariogram Modeling for Cu

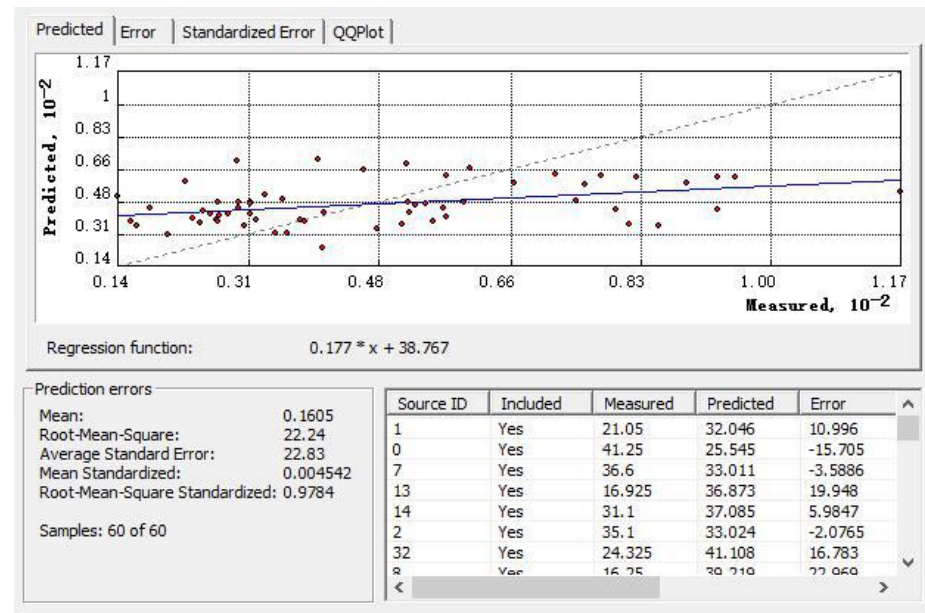

(b) The Cross Validation for Cu

Fig S3. The Semivariogram Modeling and Cross Validation for Cu

(4) The five functions mentioned above were used for semi-variograms modeling of Hg. According to the criteria mentioned previously, the Exponential was a more appropriate model for interpolation of Hg with cross validation. The Semivariogram Modeling and Cross Validation for Hg were shown in Fig S4. The sill is the partial sill plus the nugget. The nugget, sill and nugget/sill are 0.0056708, 0.0195268, and 0.2904, respectively.

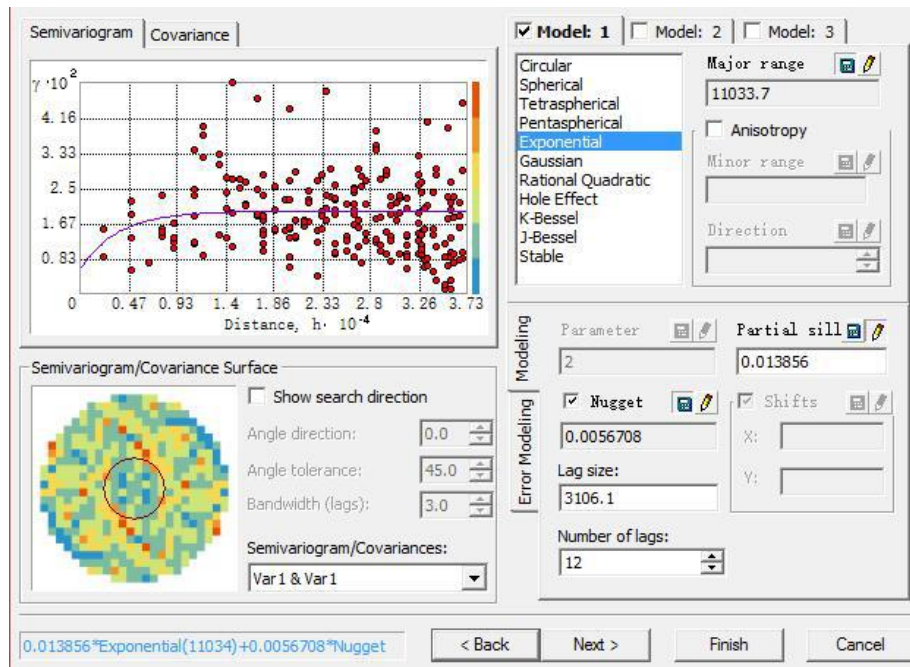

(a) The Semivariogram Modeling for Hg

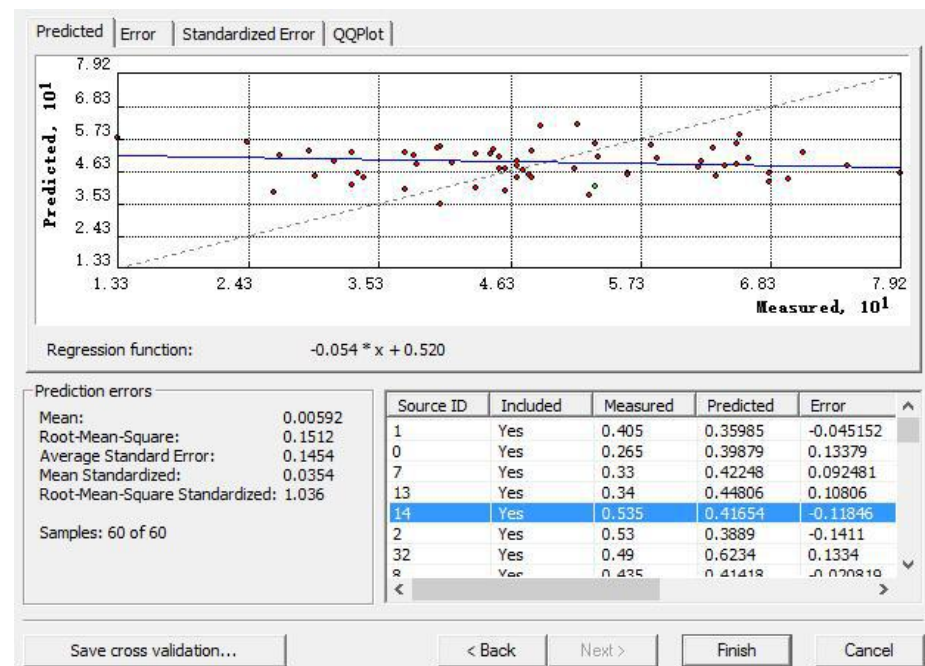

(b) The Cross Validation for Hg

Fig S4. The Semivariogram Modeling and Cross Validation for Hg

(5) The five functions mentioned above were used for semi-variograms modeling of Ni. According to the criteria mentioned previously, the Gaussian was a more appropriate model for interpolation of Ni with cross validation. The Semivariogram Modeling and Cross Validation for Ni were shown in Fig S5. The sill is the partial sill plus the nugget. The nugget, sill and nugget/sill are 101.72, 121.434, and 0.8376, respectively.

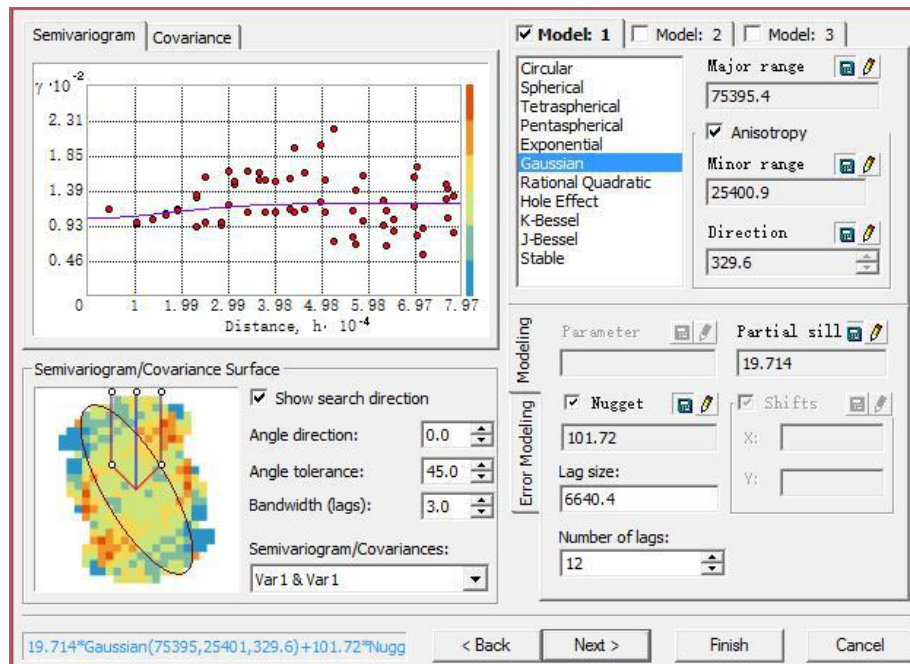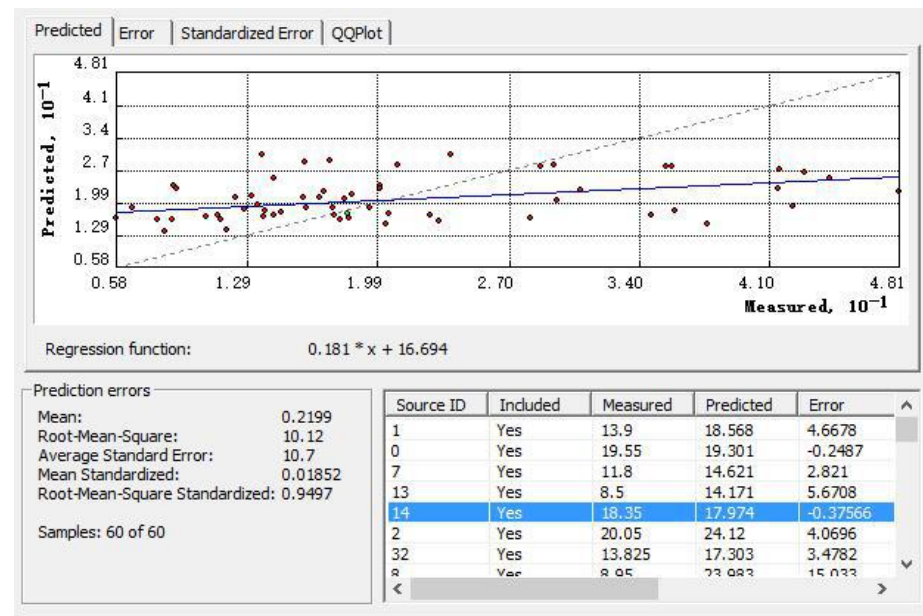

Fig S5. The Semivariogram Modeling and Cross Validation for Ni



(6) The five functions mentioned above were used for semi-variograms modeling of Pb. According to the criteria mentioned previously, the Gaussian was a more appropriate model for interpolation of Pb with cross validation. The Semivariogram Modeling and Cross Validation for Pb were shown in Fig S6. The sill is the partial sill plus the nugget. The nugget, sill and nugget/sill are 412.34, 539.06, and 0.7649, respectively.

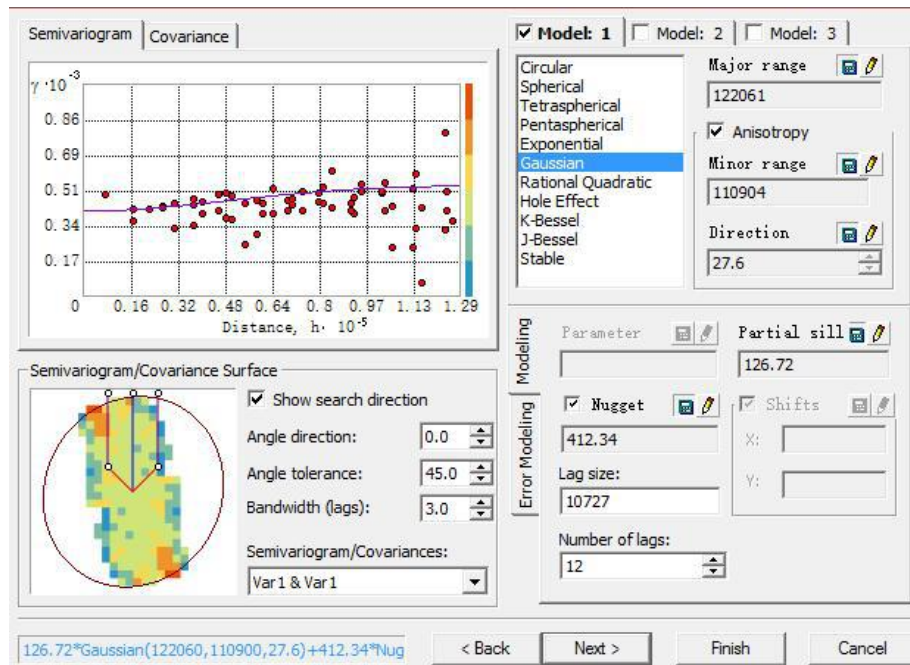

(a) The Semivariogram Modeling for Pb

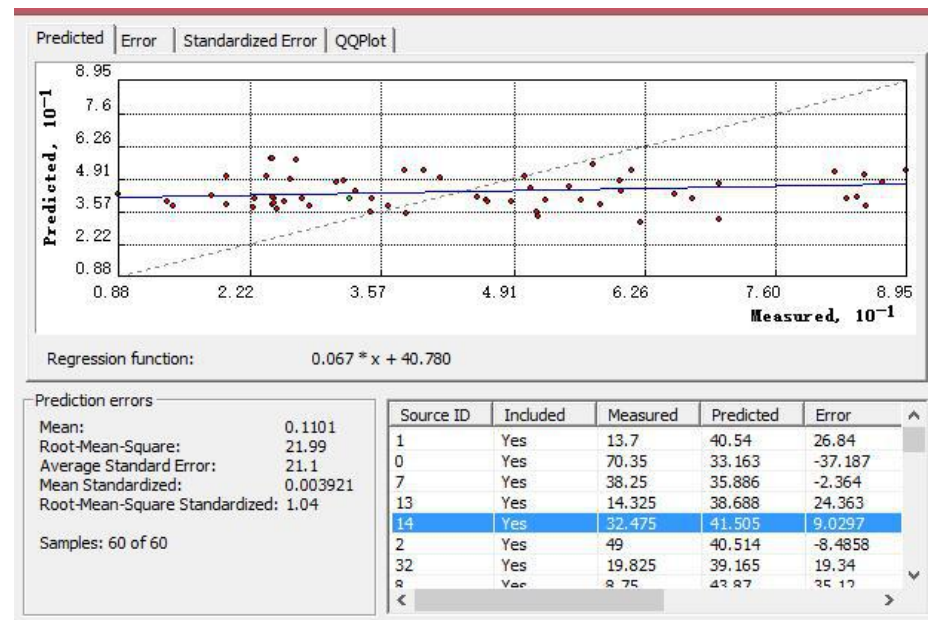

(b) The Cross Validation for Pb

Fig S6. The Semivariogram Modeling and Cross Validation for Pb

(7) The five functions mentioned above were used for semi-variograms modeling of Zn. According to the criteria mentioned previously, the Stable was a more appropriate model for interpolation of Zn with cross validation. The Semivariogram Modeling and Cross Validation for Zn were shown in Fig S7. The sill is the partial sill plus the nugget. The nugget, sill and nugget/sill are 19413, 35693, and 0.5439, respectively.

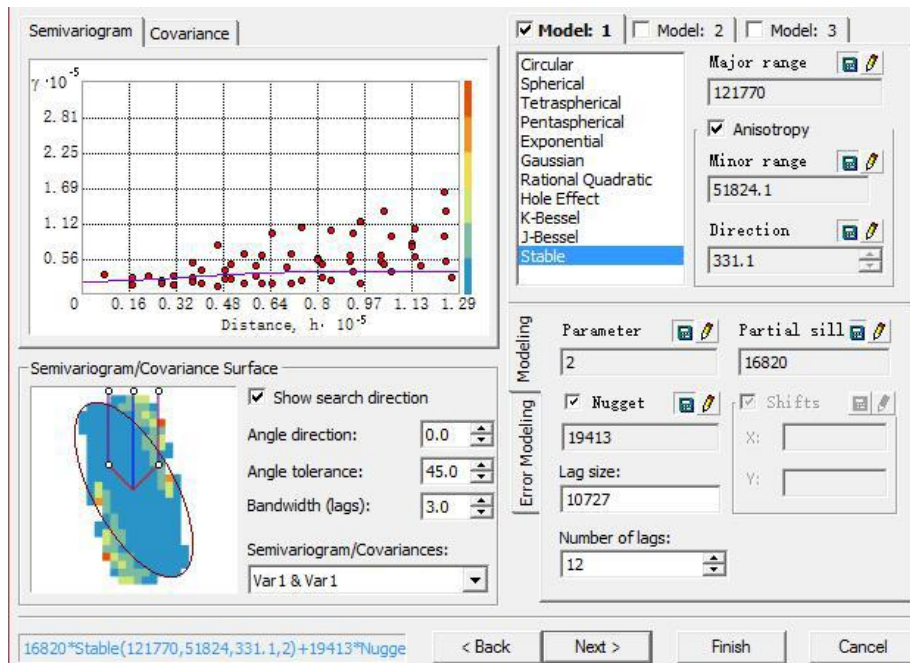

(a) The Semivariogram Modeling for Zn

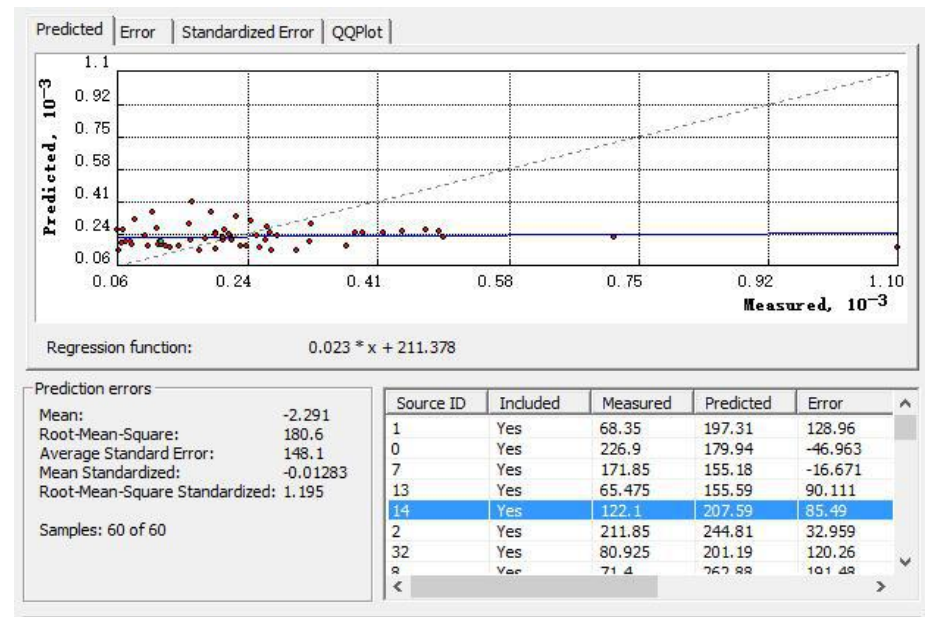

(b) The Cross Validation for Zn

Fig S7. The Semivariogram Modeling and Cross Validation for Zn
